# Supplementary material for: Covid-19 lockdown effects on the seismic recordings of Central America
Source: Copernicus journal article supplement (doi:10.5194/se-2021-25), 2021-06-14
Supplement: Supplementary file [file se-2021-25-RC2-supplement.zip]

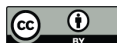

# 1 Covid-19 lockdown effects on the seismic recordings of Central 2 America

3 Mario Arroyo-Solórzano<sup>1</sup>, Diego Castro-Rojas<sup>2</sup>, Frédérick Massin<sup>3</sup>, Lepolt Linkimer<sup>1</sup>, Ivonne  
 4 Arroyo<sup>1</sup> & Robin Yani<sup>2</sup>

5  
 6 1: Escuela Centroamericana de Geología y Red Sismológica Nacional, Universidad de Costa Rica, San José, Costa  
 7 Rica.

8 2: Instituto Nacional de Sismología, Vulcanología, Meteorología e Hidrología, INSIVUMEH, Ciudad de  
 9 Guatemala, Guatemala.

10 3: ETHZ-SED, Swiss Seismological Service, Zurich, Switzerland.

11 *Correspondence to:* Mario Arroyo-Solórzano ([mario.arroyosolorzano@ucr.ac.cr](mailto:mario.arroyosolorzano@ucr.ac.cr))

12  
 13 **Abstract.** A noticeable decrease in seismic noise was registered worldwide during the lockdown <sup>measures?</sup> ~~measurements~~  
 14 <sup>implemented in</sup> ~~of~~ 2020 to prevent the <sup>spread of</sup> Covid-19. In Central America, strong lockdown measures started during March of 2020.  
 15 We have used seismic stations from Costa Rica, Guatemala, El Salvador, and Nicaragua to study the effects of  
 16 these measures on seismic records by characterizing temporal variations in the high-frequency band (4-14 Hz) via  
 17 spectral <sup>and amplitude</sup> ~~analyses~~ analyses. In addition, we study the link between the reduction of seismic noise and the  
 18 number of earthquake detection and felt reports in Costa Rica and Guatemala. We found that seismic stations near  
 19 the capitals of Costa Rica, Guatemala, and El Salvador, presented a decrease in the typical seismic noise level  
 20 from 200 to 140 nm, 100 to 80 nm, and 120 to 80 nm, respectively. Our results showed that the largest reduction  
 21 of ~ 50% in seismic noise <sup>was?</sup> ~~were~~ observed <sup>at</sup> ~~in~~ seismic stations near main airports, busy roads, and densely populated  
 22 cities. In Nicaragua, the seismic noise levels remained constant (~ 40 nm) as no lockdown measures were applied.  
 23 We noted that the decrease in seismic noise levels allowed <sup>d</sup> ~~to~~ improve earthquake locations <sup>an increased</sup> ~~and increment the~~  
 24 number of reports of low magnitude felt earthquakes. Our results imply that seismic data can be useful to verify  
 25 the compliance of lockdown measures and to explore effects of the decrease in the seismic noise in the earthquake  
 26 detection and felt reports.

## 27 1. Introduction

28 The seismic noise recorded by seismometers includes microseisms and atmospheric, and anthropogenic or cultural  
 29 noise (Nimiya, 2020). The anthropogenic seismic noise in urban areas tends to be <sup>louder</sup> ~~more~~ complex than  
 30 elsewhere. This includes seismic signals generated by human activities such as transportation and industrial  
 31 activities (Gross and Ritter, 2009; Diaz et al., 2017; Hong et al., 2020). It is difficult to identify precisely at what  
 32 frequencies and how different human activities are represented in seismic records (McNamara and Buland, 2004;  
 33 Green et al., 2017; Lecoq et al., 2020a). Indeed, the seismic noise includes various anthropogenic noises as a  
 34 function of frequency, time, and distance in a range usually between 1-40 Hz (Kuzma et al., 2009; Riahi and  
 35 Gerstoft, 2015; Diaz et al., 2017).

36 A reduction in the seismic noise worldwide has been observed coinciding with the lockdown measures to prevent  
 37 <sup>the spread of</sup> ~~the~~ Covid-19, whose outbreak was declared pandemic in March 2020 by the World Health Organization (Sohrabi



et al., 2020). This effect has been first described for Shillong (India) by Somala (2020), for Northern Italy by Poli et al. (2020), and by Lecocq et al. (2020a) at a global scale. Governments have tried to prevent or delay the spread of Covid-19 by forcing the social distancing through measures like limiting non-essential activities, closing schools and universities, restriction of the mobility of the citizens, and shutdown of workplaces (Piccinini, et al., 2020).

Central America has been severely affected by the ~~pandemic~~<sup>pandemic</sup> of Covid-19 with an estimated death toll of 18,145 by the end of 2020 (SICA, 2020). This small land bridge (1400 km long, 80–400 km wide) between the Americas is home to about 50 million inhabitants. It is located mostly in the Caribbean Plate and the Panama Microplate, surrounded by four major tectonic plates: the Cocos plate to the southwest, the Nazca plate to the south, and the North American and South American plates to the north and southeast, respectively. The boundary between the Cocos and Caribbean plates occurs at the Middle America Trench (MAT), where the Cocos Plate subducts underneath the Caribbean Plate and the Panama Microplate. The North Panama Deformed Belt (NPDB) constitutes the Caribbean Plate-Panama Microplate boundary, and the Polochic-Motagua Fault System (PMFS) marks the Caribbean-North American Plate boundary (Figure 1) (e.g. Adamek et al., 1988; Kellogg and Vega, 1995; Trenkamp et al., 2002; Vargas and Mann, 2013). This complex and active tectonic setting in Central America generates high seismicity rates and volcanic activity. For instance, some of the deadliest earthquakes (Figure 1) were the 1910 M 6.4 Cartago earthquake in Costa Rica, the 1972 M 6.3 Managua earthquake in Nicaragua, the 1976 M 7.5 Guatemala earthquake, and the 1986 M 5.7 San Salvador earthquake in El Salvador, with ~600, ~20,000, ~23,000, and ~6,000 fatalities, respectively (Espinosa, 1976; Mann et al., 1990; Harlow et al., 1993; Alonso-Henar et al., 2013).

Seismometers in urban settings **maximize the spatial coverage** of seismic networks and warn of local geological hazards **as the amplification effect** (Ashenden et al., 2011). Some of the main institutions in charge of the permanent monitoring of seismicity in Central America are: the National Institute of Seismology, Volcanology, Meteorology and Hydrology (INSIVUMEH) in Guatemala, the National Service for Territorial Studies (SNET in El Salvador), the Nicaraguan Institute for Territorial Studies (INETER) in Nicaragua, and in Costa Rica the National Seismological Network of the University of Costa Rica (RSN-UCR) and the Volcanological and Seismological Observatory of the National University of Costa Rica (OVSICORI-UNA). Belize and Honduras lack an official seismic service and Panama has several local networks, such as the Chiriqui and the University of Panama (UPA) seismic networks.

Because ~~the measure~~<sup>high levels</sup> of the root mean square (RMS) of the high-frequency seismic anthropogenic noise displacement (HFSAND-RMS) hampers the ability to detect signals from earthquakes and volcanic eruptions, its analysis **and differentiation** is of the utmost importance (Lecoq et al., 2020a). The objective of this work is to present the first study of HFSAND-RMS levels during Covid-19 in Central America (Figure 1) to evaluate the effects of lockdown measures in the seismic record near urban centers, in the capitals of four countries in the region: Costa Rica, Guatemala, El Salvador, and Nicaragua. In addition, specific cases of stations near populated centers and airports of Costa Rica and Guatemala are analyzed. Finally, we show the impact of the low noise levels <sup>on</sup> the capability <sup>of detecting</sup> ~~to detect~~ earthquakes <sup>on</sup> and the number of felt reports before and during the lockdown.



## 76 2. Data and methods

### 77 2.1. Seismic Data

78 We consider data from the vertical component of seismometers from 10 seismic stations located in Costa Rica,  
 79 Guatemala, El Salvador, and Nicaragua. Four of them are operated by the RSN (Costa Rica), four more by the  
 80 INSIVUMEH (Guatemala), one belongs to the MARN (El Salvador), and one to the INETER (Nicaragua) (Figures  
 81 1 and A1). The stations have been selected within or near the capitals of each country, to obtain a general overview  
 82 of the changes in the seismic records induced by the lockdown measures. In Costa Rica and Guatemala, where we  
 83 have access to the records, we selected three more stations close-by other populated centers or airports.

84  
 85 The selected stations include both broadband seismometers (BB) and short-period geophones (SP). For Costa  
 86 Rica, we use the TC.SJS1 station (BB, Guralp CMG-6TD) located in an urban area at the University of Costa  
 87 Rica main campus, in San Jose. This station is 3 meters below the ground level, and the sensor is installed in a  
 88 concrete pillar. We also inspected the stations TC.BELE, TC.ERIA, and TC.ZEDO (SP, Sixaola instruments  
 89 manufactured by Raspberry Shake), located in urban areas at fire station buildings at ground level, close to Juan  
 90 Santamaria International airport, Liberia city in Northwestern Costa Rica, and Perez Zeledon city in Southeastern  
 91 Costa Rica, respectively. For Guatemala, we used the GL.GCG4 station (SP, OSOP Sixaola) located in an urban  
 92 area, close to the Aurora International airport. This station is 3 meters below the ground level, and the sensor is  
 93 installed in a concrete pillar. Furthermore, we analyzed the stations GL.HUEH, GL.RETA, and GL.CHIE (BB-  
 94 Guralp CMG-3ESP), located in urban areas, close to local airports and Huehuetenango, Retalhuleu, and  
 95 Esquipulas downtowns, respectively. These stations are at ground level inside a dedicated vault with a concrete  
 96 pillar.

97  
 98 For El Salvador and Nicaragua, the stations SV.CEDA (BB, Nanometrics Trillium-120p), located in an urban  
 99 area, close to the Panamerican highway at La Libertad and NU.MGAN (BB, Streckeisen STS-2), located in an  
 100 urban area at INETER, close to Managua downtown were used, respectively. The continuous seismic data for  
 101 Costa Rica and Guatemala were obtained directly from the seismological networks of each country  
 102 (INSIVUMEH, 2013; RSN, 2017) and from IRIS for El Salvador and Nicaragua, via FDSN (International  
 103 Federation of Digital Seismograph Network) web services (INETER, 1975; SNET, 2004). We analyzed data over  
 104 a time span covering one year from November 1, 2019 to October 31, 2020.

### 105 2.2. Seismic noise analyses

106 A spectral and amplitude analysis was carried out to characterize temporal variations in high-frequency (4-14 Hz)  
 107 seismic signals dominated by HFSAND-RMS. We computed the high-frequency seismic noise amplitude prior to  
 108 and during the pandemic lockdown measures (before March 16, 2020). The results have been compared to the  
 109 **lockdown measures?** **containment measures** implemented by the governments of each country, as documented in Table A1 (SICA,  
 110 2020), and their compliance by the population.

111  
 112 The high-frequency seismic noise amplitudes have been computed following the method used by Lecoq et al.  
 113 (2020a), using the code provided by Lecoq et al. (2020b). In this way, using the method of Welch (1967), a power



spectral density (PSD) is calculated for each 30-minute time-windows with a 50 percent overlap, converted into equivalent displacement, and combined in a single RMS value per time-window (Blackman and Tukey, 1958). This reduces the numerical noise in the power spectra at the expense of reducing the frequency resolution due to frequency binning, but this effect is minimized with a conservative smoothing parameterization (Lecoq et al., 2020a). Moreover, to highlight the general temporal pattern of the amplitude of the seismic noise, the displacement RMS time series with four samples per hour were averaged each day between 6h-16h, according to local time (UTC-6). Additionally, for Costa Rica and Guatemala, the median displacement RMS of each hour was computed, for each day, comparing the result before and during the lockdown for some stations in these countries. Finally, an analysis of the percentage change in the high-frequency seismic displacement RMS was performed. This allows to obtain a median amplitude value for the whole period during the major restrictive measures (March 16 to May 15, 2020) and to compare it with the median of the period from January 15 to March 15, 2020 (before lockdown measures).

### 2.3. Earthquake detection capability and felt reports

For Costa Rica and Guatemala, the effect of the reduction of HFSAND-RMS on earthquake detection was analyzed during the lockdown period, using the seismic catalog of the RSN (Costa Rica) and the INSIVUMEH (Guatemala). In both observatories, earthquakes are located automatically by SeisComp3 (Gempa, 2019) and manually using the software SeisAn (Havskov et al. 2020). The lockdown measures and the seismic noise level reduction during this period motivated the systematic test of their influence on the amount and magnitude of earthquakes detected, as well as on the number of seismic phases that could be identified. With this objective, a period before lockdown from November 1, 2019 to March 15, 2020 (4.5 months) was taken as a reference to compare with a proportional period during the confinement measures, from March 16 as of July 31, 2020 (4.5 months). Using curves of earthquake magnitude-frequency distribution, we inspected earthquakes with  $M_w \leq 4.0$  before and during lockdown, because small events reflect better the variations in the detection capability. Furthermore, we quantified the average number of seismic phases per earthquake as function of the magnitude, obtaining linear regressions for the two data sets.

We have also investigated the effect of lockdown measures on the number of earthquakes felt by the population. For both, Costa Rica and Guatemala, we counted and show the number of earthquakes reported as felt in different intervals of magnitude. In both countries, the population reports are done via telephone and through social networks. Further, to analyze if there is a correlation between the decrease in HFSAND-RMS and the increase in low-magnitude felt events, and between the low-magnitude felt events and the hour of the day, we explored the spatial context of these with a map of felt seismicity and its occurrence hour, before and during lockdown.

Additionally, the RSN maintains an interactive application for smartphones called “RSN”, which includes the module “¿Lo Sentiste?” (Linkimer and Arroyo, 2020), also available at the RSN website. This app was developed by the RSN based on the questionnaire “Did you feel it?” of the United States Geological Service (USGS) (Atkinson and Wald, 2007; Wald, et al., 2011), which translated to Spanish and simplified and adapted to Costa Rica. The users access the app and answer 12 simple questions and obtain a quick estimation of the intensity determined by the community decimal intensity (CDI), which is an aggregate of the average sums of the indexes



associated with the questions (Dengler and Dewey, 1998). All the reports are shown in an emoticon map that updates continuously and can be accessed in real time in the app or in the RSN website. Finally, after enough (> ~300) reports and outliers have been manually removed, an average intensity map is generated (Linkimer and Arroyo, 2020). We use this tool to complement the felt earthquakes analysis in Costa Rica, collecting the number of felt earthquakes reported through this app, before and during lockdown, including only the events with at least three reports and with  $M_w < 5.0$ . These events were also averaged by magnitude intervals.

### 3. Results and discussion

#### 3.1. Seismic noise and lockdown measures

Lockdown measures in Central America started on March 16. In Costa Rica, some of the main restrictions implemented by the governments were the closure of borders, schools, non-essential stores, and beaches, as well as mass evacuation prohibition and home-office implementation. Although in Costa Rica no curfew was imposed on citizens, a strict vehicle mobility restriction has been maintained during the whole pandemic. For Guatemala and El Salvador, the lockdown measures were very similar to those implemented in Costa Rica, but in some cases included restrictions on citizen mobility and curfews. These measures have suffered flexibilization and/or hardening as the pandemic evolved in each of these countries (Table A1). Very few lockdown measures were taken in Nicaragua to prevent the spread of Covid-19 and there were no specific measures applied to restrict social mobility.

An important decrease in the HFSAND-RMS is shown in seismic stations located near the capitals of Costa Rica (urban area, University of Costa Rica campus, San José), Guatemala (urban area, close to the Aurora International airport, Guatemala City), and El Salvador (urban area, close to the Panamerican highway) (Figure A1). This has been observed during the lockdown measures (March 16, 2020, Table A1 and Figures 2 and 3), except for Nicaragua (urban area, at INETER, Managua).

Figure 2 shows the time of day on the vertical axis, the period analyzed on the horizontal axis, and the high-frequency displacement RMS in colors, blue for the lowest level and yellow for the maximum level. The graph clearly shows the stillness of the night (blue colors between 22h-5h), the relative quiet of weekends (vertical blue bars that alternate periodically), and the hustle and bustle from day to day (in yellow colors). Figure 3 shows the displacement on the vertical axis and time on the horizontal axis. The orange line represents the median recorded displacement, which usually has its maximum during the hours of the day, when there is more seismic noise, and its minimum during the nights. In addition, these figures also show that the noise level is lower during the weekends. In these graphs, the beginning of the social distancing measures on March 16 (red line), the period of the end of the year holidays 2019 (1), Easter 2020 (2), and a brief period in July 2020 when there was a strict return of lockdown measures in Costa Rica (3) have been marked (Table A1).

In both types of graphs (Figures 2 and 3), for the stations in Costa Rica, Guatemala, and El Salvador, the effect of the social distancing measures can be clearly seen beginning on March 16, as a notable drop in seismic noise (displacement). At the station in Managua, Nicaragua, where no important measures were adopted to limit urban



mobility and economic activities, there is no change in the seismic record (Figures 2d and 3d). In Costa Rica, Guatemala, and El Salvador, the seismological stations show that the measures of social distancing produced a decrease in the seismic noise levels similar to those observed in the 2019 New Year holidays.

For the TC.SJS1 station in San Jose, Costa Rica (Figure 2a and 3a), the displacement during a typical working day before the lockdown used to be up to 200 nm, while during the social distancing measures, these values decreased to 140 nm on average. In the case of the GI.GCG4 station in Guatemala City (Figure 2b and 3b), the usual displacement before the lockdown used to be 100 nm on average, and during social distancing measures, these values decreased to 80 nm on average. At the SV.CEDA station, near San Salvador in the city of La Libertad (Figure 2c and 3c), the usual displacement before the lockdown used to be on average about 120 nm, while these values decreased to 80 nm in average during the main measures of social distancing.

These displacement values, progressively, as the months go by, tend to return to their usual averages as the restrictive measures have been decreased. Even so, it can be clearly seen that the levels have not yet returned to the usual <sup>pre-pandemic levels?</sup> ~~before the pandemic~~. As of November 2020, the average values shown are ~ 160 nm for San Jose, ~ 85 nm for Guatemala City, and ~ 110 nm for La Libertad, near San Salvador. This shows that some of the social distancing measures are still in place in most of the countries of the region (Table A1) or other factors are affecting the station environment (permanent or long-term activity loss, e.g., company shutdown) (Figures 2 and 3). The <sup>location where the level is?</sup> ~~place~~ closer to the usual averages is La Libertad in El Salvador. Whereas, in the case of the NU.MGAN station in Managua, Nicaragua (Figures 2d and 3d), the registered displacement values have remained constant before and during the pandemic, without any variation with respect to the usual displacement records of this station (40 nm). It is a <sup>low noise</sup> ~~little noisy~~ station, with very low value compared to the other capitals, related to its site conditions that isolate it from environmental noise. Likewise, the most drastic effect of the limitation in the mobility of the inhabitants due to the measures against the Covid-19, added to the holidays of the time, was observed during Easter in April: ~60 nm in San José, ~50 nm in Guatemala City and near San Salvador, and ~25 nm in Managua.

To evaluate in detail the effects of variations in the HFSAND-RMS record in Costa Rica and Guatemala, more seismic data collected by three more stations in each of these countries were analyzed (Figure A1). For Costa Rica, the analysis was complemented with the stations TC.BELE, TC.ERIA, and TC.ZEDO (Figure 4a). In Guatemala, with the stations GI.HUEH, GI.RETA, and GI.CHIE (Figure 4b). In addition, the daily variation of the average seismic noise per weekday, before and during the pandemic, was inspected for the station TC.SJS1 in Costa Rica (Figure 5a) and for station GI.RETA in Guatemala (Figure 5b). These stations also show a decrease in displacement RMS since the application of lockdown measures. However, the reduction, as well as the pattern of the displacement RMS time series, vary according to the station considered.

For Costa Rica (Figure 4a), the largest percentage difference in the station record is found in the TC.BELE station, located near (~3 km) the country's main airport and in the Great Metropolitan Area (GAM), where more than half of the country's population lives (Figure 1). This station varied from ~40 nm before lockdown to ~20 nm during the lockdown measures. For Guatemala (Figure 4b), a similar behavior was observed in the GI.RETA station,

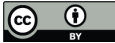

230 towards the western part of this country, which is one of the most touristic regions. This station varied from ~100  
 231 nm before lockdown to ~50 nm during the lockdown measures.

232

233 In all cases, the typical pattern of HFSAND-RMS is also shown, with minimums during weekends and nights,  
 234 and maximums during the week and day (Figure 5). This is also highlighted during the lockdown, due to the  
 235 measures adopted by each country (Table A1). Costa Rica, despite not imposing a curfew, established measures  
 236 of vehicular restriction to “control” the mobility of the population, from 19h-5h in its most strict stage. This is  
 237 highlighted in the station TC.SJS1, showing a great decrease in HFSAND-RMS during these hours (Figure 5a).  
 238 For Guatemala, the station GI.RETA clearly shows the effect of the curfew in its most restrictive stage, imposed  
 239 from 17h-5h (Figure 5b).

240

241 The percentage of HFSAND-RMS decrease was determined for the 10 stations analyzed here, in the same  
 242 frequency band (4-14 Hz). Figure 6a shows the change obtained for the stations in Guatemala and El Salvador  
 243 and Figure 6b shows the percentage obtained for the stations in Nicaragua and Costa Rica. The most outstanding  
 244 seismic noise reduction due to the lockdown measures reached between 36-49% at the GI.RETA and TC.BELE  
 245 stations. These values are explained by the ~~aspects~~ <sup>site characteristics?</sup> described above, ~~affecting~~ <sup>strong sources of noise at</sup> stations close to major cities,  
 246 highways, and high-traffic airports. Other stations that also show a high decrease (between 26-35%), are  
 247 GI.GCG4, SV.CEDA, and TC.SJS1. These changes are closely related to the proximity to the most important  
 248 populated centers (Figure 1) of the capital cities of San José and Guatemala City, and to the Panamerican highway  
 249 near San Salvador.

250

251 Intermediate values (between 16-25%) in the percentages of reduction of seismic noise were identified in the  
 252 stations GI.HUEH, GI.CHIE, and TC.ERIA. In this case, these values are associated with cities with less  
 253 population density (Figure 1) but significant activity and proximity to touristic airports, such as Liberia city, in  
 254 northwestern Costa Rica. Finally, the lowest changes (6-15%) in terms of the percentage of decrease in seismic  
 255 noise were identified in the NU.MGAN and TC.ZEDO stations. In Managua, this is due to the lack of social  
 256 distancing measures and in the case of Perez Zeledon (Costa Rica), it could be related to low population density,  
 257 ~~a less exposed station~~ <sup>a less exposed site</sup>, or lack of compliance with lockdown measures.

### 258 3.2. Effects of the lockdown in earthquake detection and felt reports

259 ~~During the time range analyzed,~~ <sup>during the time this study was conducted</sup> there were no significant earthquakes in Costa Rica and Guatemala. Before  
 260 lockdown in Costa Rica, the biggest earthquakes were two events with 5.6 Mw on 21-01-2020 and in Guatemala  
 261 a 6.2 Mw earthquake occurred on 19-11-2019, near Mexico. During lockdown, a 5.5 Mw earthquake on 15-04-  
 262 2020 and a 5.7 Mw earthquake on 26-03-2020 took place in Costa Rica and Guatemala, respectively. All these  
 263 events were offshore earthquakes related to the interplate seismogenic zone. Accordingly, we conclude that the  
 264 seismic rates during the two time periods considered in this work were not affected by any specific large event.

265

266 *Costa Rica*



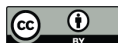

267 Since 2018, the RSN network consists of around 160 sites, qualifying as a robust network with a high capacity for  
268 detecting low magnitude earthquakes (Linkimer et al., 2018). Figure 7 shows the comparison of the number of  
269 seismic events recorded by the RSN and the reports of earthquakes felt before and during the lockdown measures.

270  
271 Figure 7a shows the number of earthquakes on the vertical axis, and the range of magnitude on the horizontal axis,  
272 grouped in intervals of magnitude every 0.5, for earthquakes with a moment magnitude ( $M_w$ ) between 2.0 and  
273 5.5. The graph shows that there is no increase in the capacity to detect earthquakes during the lockdown measures,  
274 and it even seems that more seismicity was detected in the period before lockdown, possibly due to higher seismic  
275 productivity in that period. On the other hand, Figure 7b shows the average number of seismic phases per  
276 earthquake of the same magnitude on the vertical axis and the respective magnitudes on the horizontal axis, for  
277 earthquakes  $< 4.0 M_w$ . Although the difference in the number of P wave arrivals before and during the pandemic  
278 is not (between 1 and 5 picks for magnitudes between 1.8 to 4.0), the values are consistently higher during the  
279 pandemic, especially for the lower magnitudes ( $\leq M_w 3.5$ ). This suggests that the decrease in HFSAND-RMS  
280 during lockdown may have had a direct positive effect on the earthquake detection capability of the RSN.

281  
282 Figure 7c shows the number of felt earthquakes reported through social networks or telephone calls on the vertical  
283 axis and the range of magnitude of those earthquakes on the horizontal axis, grouped in intervals of magnitude  
284 every 0.5, for earthquakes with magnitude less than  $M_w 2.0$  to greater than  $M_w 5.5$ . This graph shows that there  
285 were a greater number of earthquakes with  $M_w > 3.0$  reported as felt before the lockdown measures, but during  
286 the confinement, a greater number of reports for low magnitude earthquakes ( $M_w < 3.0$ ) were collected. In  
287 addition, based on reports through the RSN application "*¿Lo Sentiste?*", Figure 7d shows the average number of  
288 reports for seismic events ( $M_w < 5.0$ ) in a magnitude interval on the vertical axis and the respective interval of  
289 magnitude on the horizontal axis. The trend lines in this graph show how the application "*¿Lo Sentiste?*" collected,  
290 on average, more felt reports for magnitudes  $M_w < 5.0$  during the lockdown measures. These figures show a  
291 greater sensitivity of the population to low magnitude earthquakes, possibly because longer stays in their homes,  
292 favored by the implementation of home office and restrictions of mobility, allowed them to perceive events and  
293 make their reports.

294  
295 Figure 8 shows the geographical distribution of felt events reported by the RSN (Figure 7c) before (1 Nov 2019-  
296 15 Mar 2020) and during (16 Mar-31 Jul 2020) lockdown measures in Costa Rica. Even though the number of  
297 earthquake reports was higher before (99) than during (74) the lockdown measures, the percentage of low  
298 magnitude ( $M < 3.5$ ) felt earthquakes was clearly higher (46%) during the lockdown than before it (only 27%).  
299 These numbers suggest that the quiescence of the environment may be a factor contributing to more small  
300 earthquakes being reported by the community. This is also spatially observed with the higher magnitude  
301 earthquakes ( $M > 4.5$ ) before lockdown (20) than during it (11), occurred onshore and closer to population centers  
302 (Figure 8).

303  
304 We also checked the correlation between felt events, before and during lockdown, and the decrease in the  
305 HFSAND-RMS of the four seismic stations analyzed in Costa Rica. There seems to exist a correlation in three of  
306 them, two located in the metropolitan area of Central Costa Rica (TC.SJS1 and TC.BELE) and the other in an





urban area in Southeastern Costa Rica (TC.ZEDO). While there were 25 earthquakes reported as felt for Central Costa Rica before lockdown, 17 of them of low magnitude ( $M < 3.5$ ), during lockdown there were 36 felt earthquakes, 28 of them of low magnitude (Figure 8). For Southeastern Costa Rica, near the Perez Zeledon urban area (TC ZEDO), just five felt earthquakes were reported before the lockdown, all of them with  $M > 3.5$ , but during lockdown seven events were reported as felt, four of them of low magnitude (Figure 8). Additionally, in Figure 8 we show the hour of the day when the felt earthquakes occurred. As expected, more events (63% before and 74% during lockdown) were perceived during the night hours (blue earthquakes, from 18h-6h).

### Guatemala

The INSIVUMEH seismic network is still under development. This network consists of 24 seismic stations, most of them Guralp broadband sensors, some installed inside the main military detachments or national airports, while others are installed in the main tourist cities of the country. For this reason, these stations can reach high levels of seismic noise, which is why detecting low-magnitude earthquakes under “normal” conditions can be very difficult.

In Figure 9, a comparison between the statistics before and during the lockdown measures is presented, where the number of earthquakes is on the vertical axis and the range of magnitude of these on the horizontal axis, grouped in intervals of half a unit of magnitude. The graph clearly shows that a higher number of low-magnitude events was recorded during the lockdown measures. Moreover, the average number of seismic phases per event of the same magnitude increases for magnitudes lower than 3.0 during the lockdown (Figure 9b). The effect of seismic noise reduction on earthquake detection is stronger in Guatemala than in Costa Rica, probably because of the much lower seismic station density in Guatemala.

Furthermore, it should be noted that the <sup>lockdown</sup> measures implemented by the Guatemalan government were some of the most drastic in the region. Moreover, the number of events reported by the population as “felt” earthquakes shows an interesting trend of a general increase during the lockdown period (Figure 9c), even considering that reporting an earthquake as “felt” has many variables such as the seismic activity itself.

Figure 10 shows the distribution of the felt earthquakes reported to INSIVUMEH by the population (Figure 9c) before and during the lockdown in Guatemala. Before the lockdown, a total of 34 seismic events were reported as felt, while during lockdown that number increased to 47. The earthquake magnitudes were higher before lockdown (Figure 10a) with 21 earthquakes above  $M 4.5$  (62% of the total felt events in this period) than during lockdown (Figure 10b), with 19 earthquakes above  $M 4.5$  (40% of the total felt events in this period). Hence, during the lockdown there were more felt earthquakes of lower magnitude ( $M < 4.5$ ), including three earthquakes below  $M 3.5$ , in contrast to just one before the lockdown. This behavior indicates a good correlation with the quiescence of the environment and low-magnitude events felt during the lockdown period (Figure 10).

From the spatial distribution of felt earthquakes during lockdown, we observed that, unlike before, there are more events originated onshore and mainly close to the populated places, such as Guatemala City and Huehuetenango. These are epicentral locations near two of the seismic stations for which the decrease in the HFSAND-RMS was observed: GI.GCG4 and GI.HUEH, respectively. In a seismic network under development like the INSIVUMEH,



347 with fewer stations, a high percentage of the low magnitude seismicity is likely not detected due to ambient noise,  
 348 but the <sup>lockdown</sup> ~~confinement~~ measures cause an improvement <sup>of</sup> ~~on~~ the detection capacity of the network. Finally, most of  
 349 the earthquakes felt in Guatemala (~60%) occur mostly during not working hours (blue and light blue earthquakes,  
 350 from 18h-6h) both before and during the lockdown periods (Figure 10).

#### 351 4. Conclusions

352 An important decrease in the high-frequency seismic noise was detected <sup>at</sup> ~~in~~ stations of three Central American  
 353 countries during the lockdown measures adopted to prevent the <sup>spread of</sup> ~~Covid-19~~. In Costa Rica, Guatemala, and El  
 354 Salvador, the measures of social distancing produced seismic noise levels comparable to those observed during  
 355 the New Year holidays from previous years. The displacement observed decreased from 200 to 140 nm in San  
 356 Jose, from 100 to 80 nm in Guatemala City, and from 120 to 80 nm in the city of La Libertad near San Salvador.  
 357 In Nicaragua, with very few measures in place, there were no effects on the seismic noise levels (40 nm).

358  
 359 There is a good agreement between certain measures and the reduction in the seismic noise levels. The greatest  
 360 impact was observed in connection with the closure of educational centers and non-essential stores, the curfew  
 361 from 17h to 5h in Guatemala, and the restriction on vehicular mobility from 19h to 5h in Costa Rica. The decrease  
 362 in the high-frequency seismic anthropogenic noise displacement is strongly dependent on the location of the  
 363 station and on the lockdown measures. Four categories of seismic noise reduction were identified (very high, high,  
 364 intermediate, and low), with significant values of ~50% decrease in stations near airports, busy roads, and densely  
 365 populated cities.

366  
 367 In Costa Rica, the lower levels in seismic noise allowed the detection of a higher number of seismic phases and  
 368 therefore, the location of more small earthquakes than usual, as well as more low magnitude earthquakes ( $M <$   
 369 3.5) reported as felt. Similarly, in Guatemala, where the seismic network is still under development, the reduction  
 370 of seismic noise levels also induced an increase in the amount of the phase picking per event and, therefore, it was  
 371 possible to detect a significantly higher number of low magnitude earthquakes ( $< 2.5$ ) than before the lockdown.  
 372 In addition, there were more felt reports during lockdown. For both countries, a spatial correlation was found  
 373 between felt earthquakes reported during lockdown and the decrease in seismic noise, mainly in the urban areas  
 374 of Central and Southeastern Costa Rica, and Guatemala City and Huehuetenango in Guatemala.

375  
 376 Felt events corresponded mainly to the higher magnitudes ( $M > 4.5$ ) earthquakes, but low-magnitude felt events  
 377 ( $M < 3.5$ ) presented a high correlation with the quiescence of the environment. A higher sensitivity of the  
 378 population to low magnitude earthquakes was found in Costa Rica and Guatemala, possibly because longer stays  
 379 in their homes, favored by the implementation of home office and restrictions on mobility, allowed them to  
 380 perceive events and make their reports. This work demonstrates that seismic networks can monitor population  
 381 mobility and consequently can be used to verify the compliance of lockdown measures and to explore effects of  
 382 the decrease in the seismic noise in the earthquake detection and felt reports.

#### 383 384 Code availability

385 All the codes used to analyze the seismic data are available in Lecocq et al. (2020b).



386

387 **Data availability**

388 The data is available by FDSN web services for INSIVUMEH and RSN-UCR seismic networks.

389

390 **Author contributions**

391 MA designed the study and wrote the paper with contributions from all co-authors. MA and DC processed the  
 392 seismic data and made figures. All the authors interpreted and analyzed the results and revised the article.

393

394 **Competing interests**

395 There are no competing interests.

396

397 **Acknowledgments**

398 This work was partially supported by the University of Costa Rica (UCR) projects 113-B5-704 “Vigilancia  
 399 sísmica de Costa Rica” and 113-B9-911 “Programa de Investigación Red Sismológica Nacional”. Financial  
 400 support at the RSN for seismic instrumentation has been mainly provided by the UCR and the Law Number 8488  
 401 of the Republic of Costa Rica. Financial support at the INSIVUMEH for seismic instrumentation has been mainly  
 402 provided by the government of Guatemala. We thank Dr. Koen Van Noten (Topical Editor) for his suggestions to  
 403 improve the manuscript. Also, special thanks to all the personnel of all Central American seismic networks for  
 404 maintaining the seismic instruments, locating systems, and computer programs in operation, most of the time  
 405 under very difficult conditions.

406

407 **References**

408 Adamek, S., Frohlich, C., and Pennington, W.: Seismicity of the Caribbean-Nazca Boundary: Constraints on  
 409 Microplate Tectonics of the Panama Region. *J. Geophys. Res.*, 93, 2053-2075,  
 410 <https://doi.org/10.1029/JB093iB03p02053>, 1998.

411

412 Alonso-Henar, J., Montero, W., Martínez-Díaz, J., Álvarez-Gómez, J., Insua-Arévalo, J., and Rojas, W.: The  
 413 Aguacaliente Fault, source of the Cartago 1910 destructive earthquake (Costa Rica). *Terra Nova*. 25(5), 368-373.  
 414 doi: 10.1111/ter.12045, 2013.

415

416 Alvarado, G., Benito, B., Staller, A., Climent, Á., Camacho, E., Rojas, W., and Lindholm, C.: The new Central  
 417 American seismic hazard zonation: Mutual consensus based on up to day seismotectonic framework.  
 418 *Tectonophysics*. 721 462–476, <https://dx.doi.org/10.1016/j.tecto.2017.10.013>, 2017.

419

420 Ashenden, C., Lindsay, J., Sherburn, S., Smith, I., Miller, C., and Malin, P.: Some challenges of monitoring a  
 421 potentially active volcanic field in a large urban area: Auckland volcanic field, New Zealand. *Nat. Hazards*, 59,  
 422 507–528. <https://doi.org/10.1007/s11069-011-9773-0>, 2011.

423

424 Atkinson, G. and Wald, D.: “Did You Feel It?” intensity data: A surprisingly good measure of earthquake ground  
 425 motion. *Seismological Research Letters*, 78(3), 362-368, 2007.

426

427 Blackman, R., Tukey, J., and Tukey, W.: The measurement of power spectra from the point of view of  
 428 communications engineering—Part I. *Bell Syst. Tech. J.*, 37, 185–282, <https://doi.org/10.1002/j.1538-7305.1958.tb03874.x>, 1958.

429  
 430



- 431 Dengler, L. A. and Dewey, J. W.: An Intensity Survey of Households Affected by the Northridge, California,  
 432 Earthquake of 17 January 1994. *Bulletin of the Seismological Society of America*, 88, 441–462, 1998.  
 433
- 434 Díaz, J., Ruiz, M., Sánchez-Pastor, P. S., and Romero, P.: Urban Seismology: On the origin of earth vibrations  
 435 within a city. *Sci. Rep.*, 7, 1–11, 2017.  
 436
- 437 Espinosa, A.F.: The Guatemalan Earthquake of February 4, 1976. *US Geol. Surv. Prof. Pap.* 1002, 90, 1976.  
 438
- 439 Gempa: SeisComp 3 Real time data acquisition and processing [software computacional].  
 440 <https://www.seiscomp.de/doc/index.html>, last access : 20 Dicembre 2020, 2019.  
 441
- 442 Green, D. N., and Bowers, D.: Seismic raves: Tremor observations from an electronic dance music festival.  
 443 *Seismological Research Letters*, [https://doi: 10.1785 / gssrl.79.4.546](https://doi.org/10.1785/gssrl.79.4.546) Page 15/22, 2008.  
 444
- 445 Green, D., Bastow, I., Dashwood, B., and Nippres, S.: Characterizing Broadband Seismic Noise in Central  
 446 London. *Seismological Research Letters*, 88, 113–124, [https://doi:10.1785/0220160128](https://doi.org/10.1785/0220160128), 2017.  
 447
- 448 Groos, J. C., and Ritter, J. R. R.: Time domain classification and quantification of seismic noise in an urban  
 449 environment. *Geophys. J.*, [https://doi: 10.1111 / j.1365-246X.2009.04343.x](https://doi.org/10.1111/j.1365-246X.2009.04343.x), 2009.  
 450
- 451 Harlow, D.H., White, R.A., Rymer, M.J., and Alvarez, S.: The San Salvador earthquake of 10 October 1986 and  
 452 its historical context. *Bull. Seismol. Soc. Am.* 83 (4), 1143–1154, 1993.  
 453
- 454 Havskov, J., Voss, P. H., and Ottemöller, L.: Seismological observatory software: 30 Yr of SEISAN.  
 455 *Seismological Research Letters*, 91(3), 1846–1852, <https://doi.org/10.1785/0220190313>, 2018.  
 456
- 457 Hong, T.-K., Lee, J., Lee, G., Lee, J., and Park, S.: Correlation between Ambient Seismic Noises and Economic  
 458 Growth. *Seismological Research Letters*, 91, 2343–2354, [https://doi: 10.1785 / 0220190369](https://doi.org/10.1785/0220190369), 2020.  
 459
- 460 Información de la Red Sismológica Nacional de Costa Rica (RSN-UCR): Universidad de Costa Rica,  
 461 <https://doi.org/10.15517/TC>, 2017.
- 462 Instituto Nacional De Sismologia, Vulcanologia, Meteorologia e Hidrología de Guatemala (INSIVUMEH): Red  
 463 Sismológica Nacional [Data set]. International Federation of Digital Seismograph Networks.  
 464 <https://doi.org/10.7914/SN/GI>, 2013.
- 465 Instituto Nicaragüense De Estudios Territoriales (INETER): Nicaraguan Seismic Network. Instituto Nicaragüense  
 466 de Estudios Territoriales (INETER), <https://doi.org/10.7914/SN/NU>, 1975.  
 467
- 468 Kellogg, J.N. and Vega, V.: Tectonic development of Panama, Costa Rica and the Colombian Andes: constraints  
 469 from global positioning geodetic systems and gravity. In: Mann, P. (Ed.), *Geologic and Tectonic Development of*  
 470 *the Caribbean Plate Boundary in Southern Central America*, pp. 75–90 (GSA Special Paper, 295), 1995  
 471
- 472 Kuzma, H. A.: Vehicle traffic as a source for near-surface passive seismic imaging. *Symposium on the Application*  
 473 *of Geophysics to Engineering and Environmental Problems*, 2009 609–615, <https://doi.org/10.4133/1.3176748>,  
 474 2009.  
 475
- 476 Lecocq, T. et al.: Global quieting of high-frequency seismic noise due to COVID-19 pandemic lockdown  
 477 measures. *Science*, <http://science.sciencemag.org/content/early/2020/07/22/science.abd2438>, 2020a.  
 478



- 479 Lecocq, T., Massin, F., Satriano, C., Vanstone, M., and Megies, T.: Seismo RMS - A simple Python/Jupyter  
 480 Notebook package for studying seismic noise changes. <https://zenodo.org/record/3820046#.YBaXbS3pMIK>,  
 481 2020b.
- 482 Linkimer, L., Arroyo, I. G., Alvarado, G. E., Arroyo, M., and Bakkar, H.: The National Seismological Network  
 483 of Costa Rica (RSN): An Overview and Recent Developments. *Seismological Research Letters*, 89 (2A), 392-  
 484 398, <https://doi.org/10.1785/0220170166>, 2018.
- 485 Linkimer, L and Arroyo, I.: Ciencia ciudadana y herramientas de comunicación en la Red Sismológica Nacional  
 486 de la Universidad de Costa Rica. *Revista Comunicación*, 29 (2), 5-21, ISSN: 0379-3974 / e-ISSN1659-3820,  
 487 2020.
- 488 Mann, P., Schubert, C. and Burke, K.: Review of Caribbean neotectonics. In: Dengo, G., Case, J.E. (Eds.), *The*  
 489 *Caribbean Region. The Geology of North America*. Geol. Soc. Amer, Boulder, Colorado, pp. 307–338, 1990.
- 490 McNamara, D., and Buland, R.: Ambient Noise Levels in the Continental United States. *Bull. Seismol. Soc. Am.*,  
 491 94, 1517–1527, <https://doi.org/10.1785/012003001>, 2004.
- 492  
 493 Nimiya, H., Ikeda, T., and Tsuji, T.: Temporal changes in anthropogenic seismic noise levels associated with  
 494 economic and leisure activities during the COVID-19 pandemic. *Research Square*,  
 495 <https://doi.org/10.21203/rs.3.rs-77786/v1>, 2020.
- 496  
 497 Piccinini, D., Giunchi, C., and Olivieri, M.: COVID-19 lockdown and its latency in Northern Italy: seismic  
 498 evidence and socio-economic interpretation. *Sci Rep* 10, 16487, <https://doi.org/10.1038/s41598-020-73102-3>,  
 499 2020.
- 500  
 501 Poli, P., Boaga, J., Molinari, I., Cascone, V., and Boschi, L.: The 2020 coronavirus lockdown and seismic  
 502 monitoring of anthropic activities in Northern Italy. *Sci Rep* 10, 9404, [https://doi.org/10.1038/s41598-020-66368-](https://doi.org/10.1038/s41598-020-66368-0)  
 503 0, 2020.
- 504  
 505 Riahi, N., and Gerstoft, P.: The seismic traffic footprint: Tracking trains, aircraft, and cars seismically. *Geophys.*  
 506 *Res. Lett.*, <https://doi.org/10.1002/2015GL063558>, 2015.
- 507  
 508 Servicio Nacional de Estudios Territoriales (SNET), El Salvador (SNET-BB): International Federation of Digital  
 509 Seismograph Networks, <https://www.fdsn.org/networks/detail/SV/>, 2004.
- 510  
 511 Sistema de Integración Centroamericana (SICA) (2020). Observatorio Regional SICA-COVID 19.  
 512 <https://www.sica.int/coronavirus/observatorioSICACOVID19/medidas/Costarica>, last access: December 20,  
 513 2020.
- 514  
 515 Sohrabi, C., Alsafi, Z., O'Neill, N., Khan, M., Kerwan, A., Al-Jabir, A., Iosifidis, C., Agha, R.: World Health  
 516 Organization declares global emergency: A review of the 2019 novel coronavirus (COVID-19). *Int. J. Surg.*,  
 517 76:71-76, <https://doi.org/10.1016/j.ijsu.2020.02.034>, 2020.
- 518  
 519 Somala, S. N.: Seismic noise changes during COVID-19 pandemic: a case study of Shillong, India. *Nat. Hazards*,  
 520 103, 1623–1628, <https://doi.org/10.1007/s11069-020-04045-1>, 2020.
- 521  
 522 Trenkamp, R., Kellogg, J.N., Freymeuller, J.T. and Mora, H.P.: Wide plate margin deformation, southern Central  
 523 America and northwestern South America, CASA GPS observations. *J. S. Am. Earth Sci.* 15, 157–171, 2002.
- 524  
 525 Vargas, C.A. and Mann, P.: Tearing and breaking off of subducted slabs as the result of collision of the Panama  
 526 arc-indentor with northwestern South America. *Bull. Seismol. Soc. Am.* 103 (3), 2025–2046, 2013.
- 527



- 528 Wald, D.J., Quitoriano, V., Worden, C.B., Hopper, M. and Dewey, J. W.: USGS “Did You Feel It?” Internet-  
529 based Macroseismic Intensity Maps. *Annals of Geophysics*. 54 (6), 688-707, doi: 10.4401/ag-5354, 2011.  
530
- 531 Welch, P.: The use of fast Fourier transform for the estimation of power spectra: A method based on time  
532 averaging over short, modified periodograms. *IEEE Trans. Audio Electroacoust.*, 15, 70–73,  
533 <https://doi:10.1109/TAU.1967.1161901>, 1967.

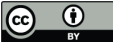

534 **Figures**  
535

536  
537  
538  
539  
540  
541  
542  
543

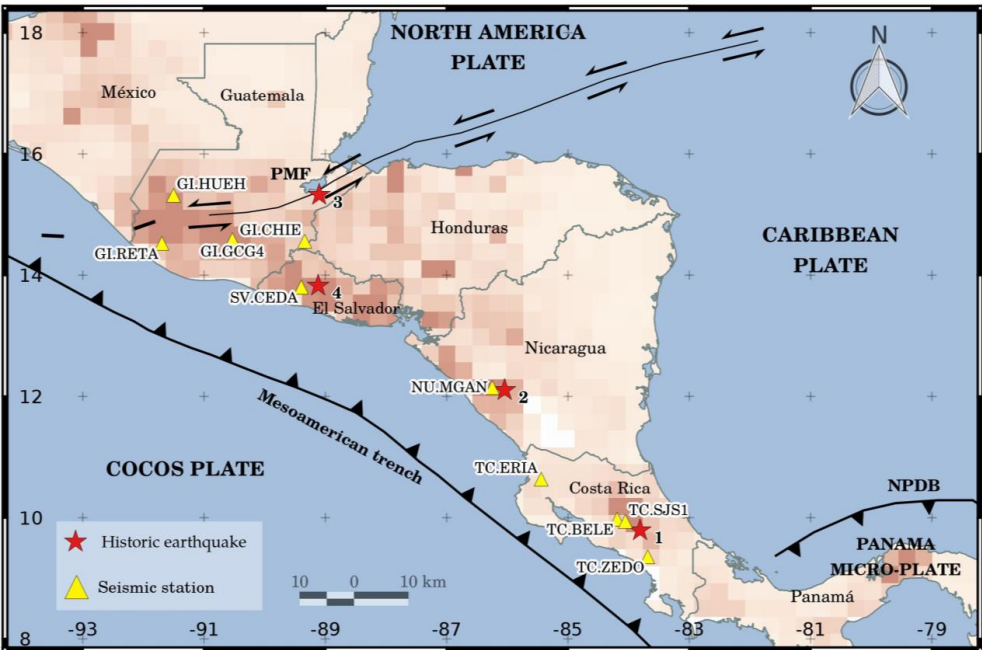

**Figure 1.** Map of Central American and location of the selected seismic stations from Costa Rica, Guatemala, El Salvador, and Nicaragua, used in this work. The map shows the approximate location of the North Panama Deformed Belt (NPDB) and the Polochic-Motagua Fault (PMF). Darker red tones indicate areas with higher population density. The numbered stars represent the historic deadliest earthquakes mentioned in the text: 1) 1910 M 6.4 Cartago, Costa Rica, 2) 1972 M 6.3 Managua, Nicaragua, 3) 1976 M 7.5 Guatemala, and 4) 1986 M 7.5 San Salvador, El Salvador. © ESRI and its data partners (ArcGis Services).





544

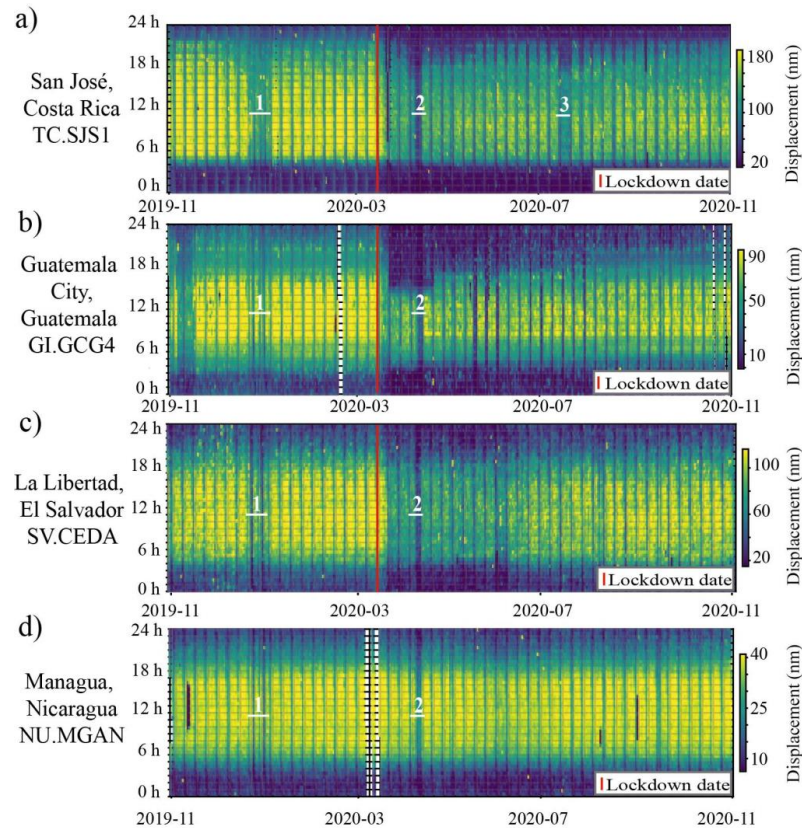

545

546

547

548

549

550

551

552

553

554

**Figure 2.** HFSAND-RMS evolution near capitals of the countries studied in an hourly grid representation. a) TC.SJS1 station in San Jose, Costa Rica. b) GI.GCG4 station in Guatemala City, Guatemala. c) SV.CEDA station, near San Salvador in the city of La Libertad. d) NU.MGAN station in Managua, Nicaragua. Gaps correspond to periods for which seismic data are unavailable and the vertical red lines indicate the time when the first lockdown measures started in Central America. The numbers 1, 2, and 3 show the New Year holidays of 2019, Easter of 2020, and a brief period in July 2020 when a strict return of lockdown measures was implemented in Costa Rica, respectively.

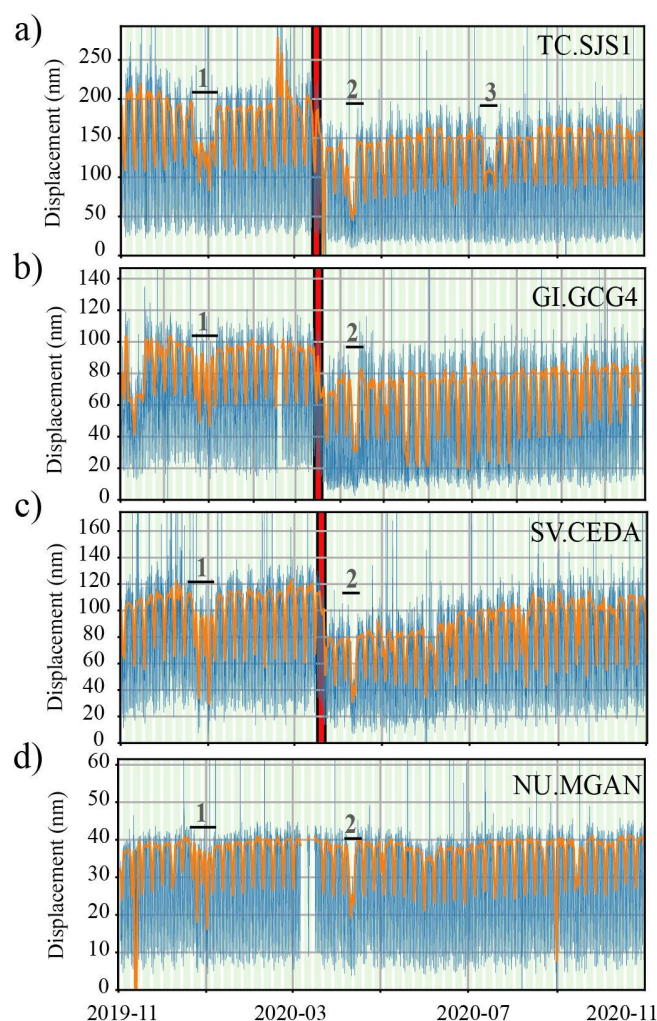

555  
 556  
 557 **Figure 3.** HFSAND-RMS evolution at the seismic stations near capitals of the countries studied. a) TC.SJS1  
 558 station in San Jose, Costa Rica. b) GL.GCG4 station in Guatemala City, Guatemala. c) SV.CEDA station, near  
 559 San Salvador in the city of La Libertad. d) NU.MGAN station in Managua, Nicaragua. The blue line corresponds  
 560 to the RMS amplitude time series of the vertical component, filtered between 4-14 Hz, and the orange line  
 561 corresponds to median day-time, between 6h-16h local time. Gaps correspond to periods for which seismic data  
 562 are unavailable and the vertical red lines indicate the time when the first lockdown measures started in Central  
 563 America. The numbers 1, 2, and 3, show the New Year holidays of 2019, Easter of 2020, and a brief period in  
 564 July 2020 when a strict return of lockdown measures was implemented in Costa Rica, respectively.  
 565

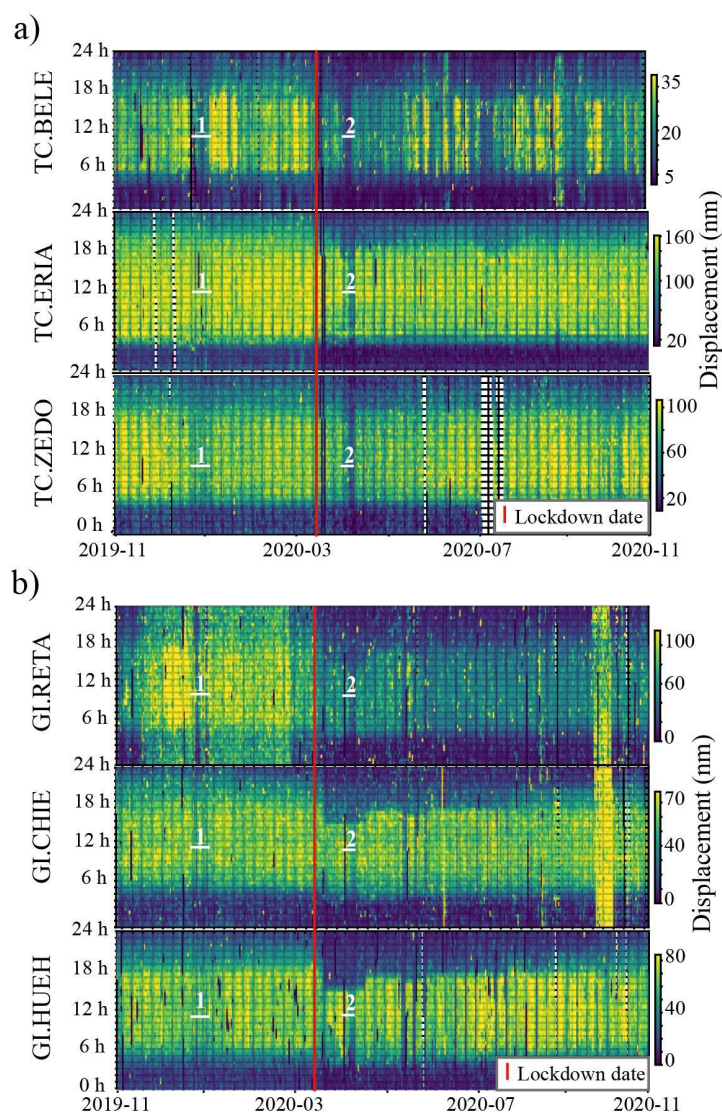

**Figure 4.** HFSAND-RMS evolution for specific sites in Costa Rica and Guatemala in an hourly grid representation. a) TC.BELE (central Costa Rica, near Juan Santamaria international airport), TC.ERIA (northern Costa Rica, urban area), and TC.ZEDO (southern Costa Rica, urban area). b) GL.HUEH (northwest of Guatemala, urban area), GL.RETA (southwest of Guatemala, urban area), and GL.CHIE (east of Guatemala, urban area). Gaps correspond with periods for which seismic data are unavailable and the vertical red lines indicate the time when the first lockdown measures started in Central America. The numbers 1 and 2 show the New Year holidays of 2019 and Easter of 2020, respectively.



576

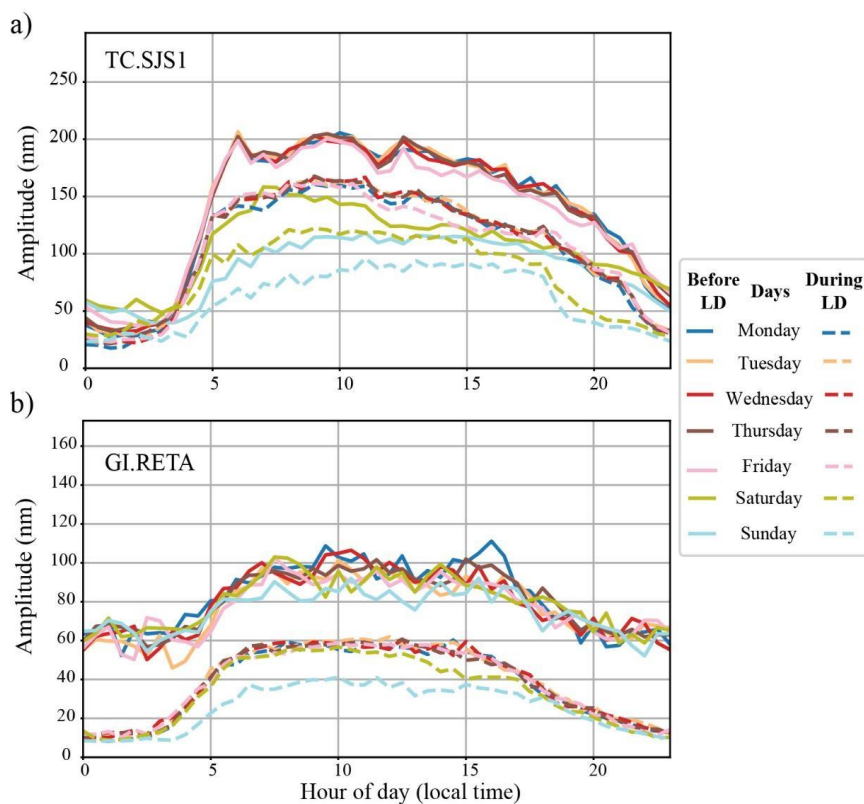

577

578

579 **Figure 5.** Daily variation of the median seismic noise per weekday, before and during the pandemic. a) TC.SJS1  
 580 station in San Jose, Costa Rica. b) GL.RETA station in Retalhuleu, southwest of Guatemala. LD means  
 581 “lockdown”.  
 582



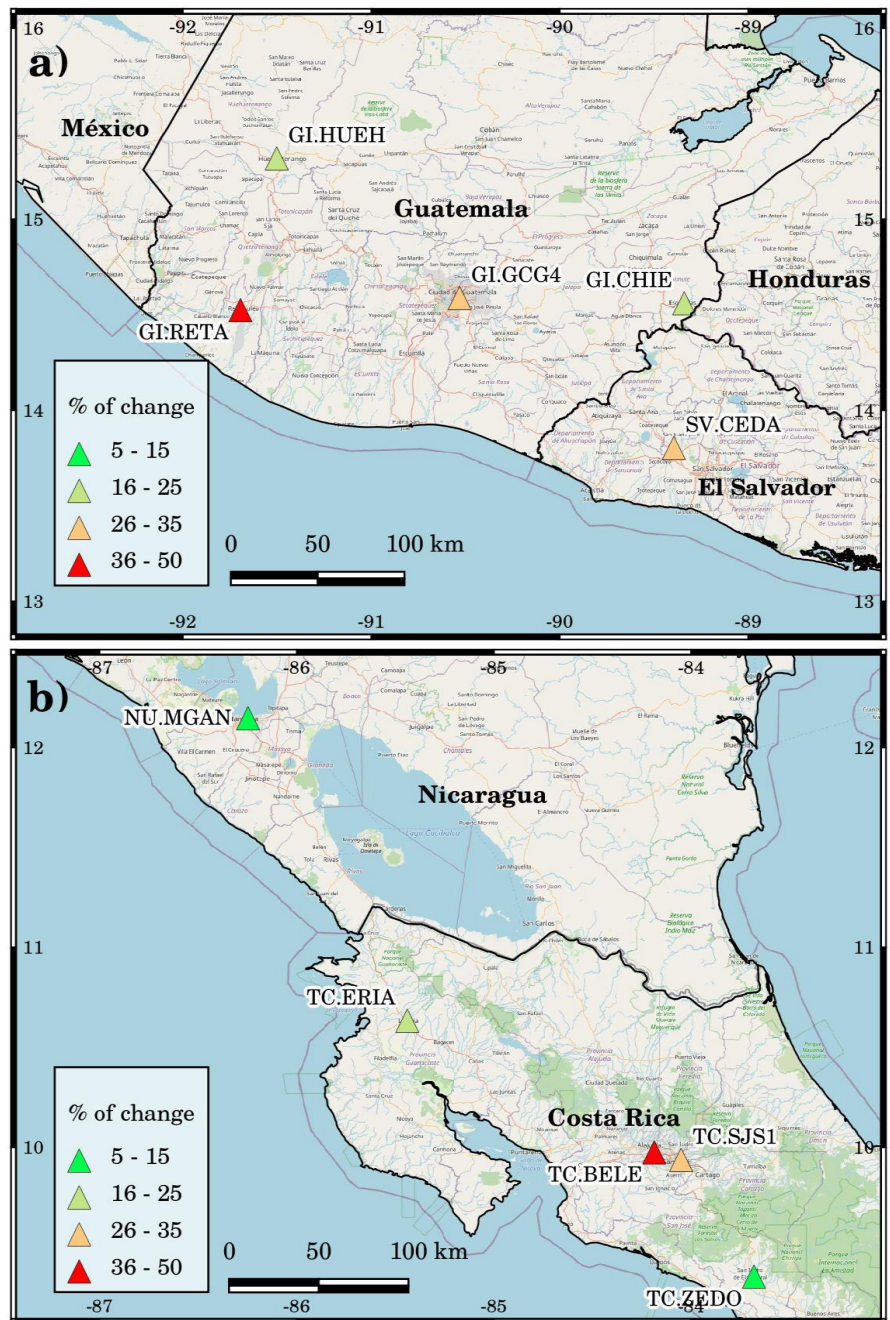

583  
584 **Figure 6.** Percent of change of HFSAND-RMS in the band 4-14Hz during the period January 15 to March 15,  
585 2020 (before lockdown measures) with respect to the interval March 16 to May 15, 2020 (after the lockdown  
586 measures entered in force). a) Percent of change in seismic stations of Guatemala and El Salvador. b) Percent of  
587 change in seismic stations of Nicaragua and Costa Rica. © OpenStreetMap contributors 2020. Distributed under  
588 the Open Data Commons Open Database License (ODbL) v1.0.

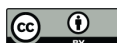

589

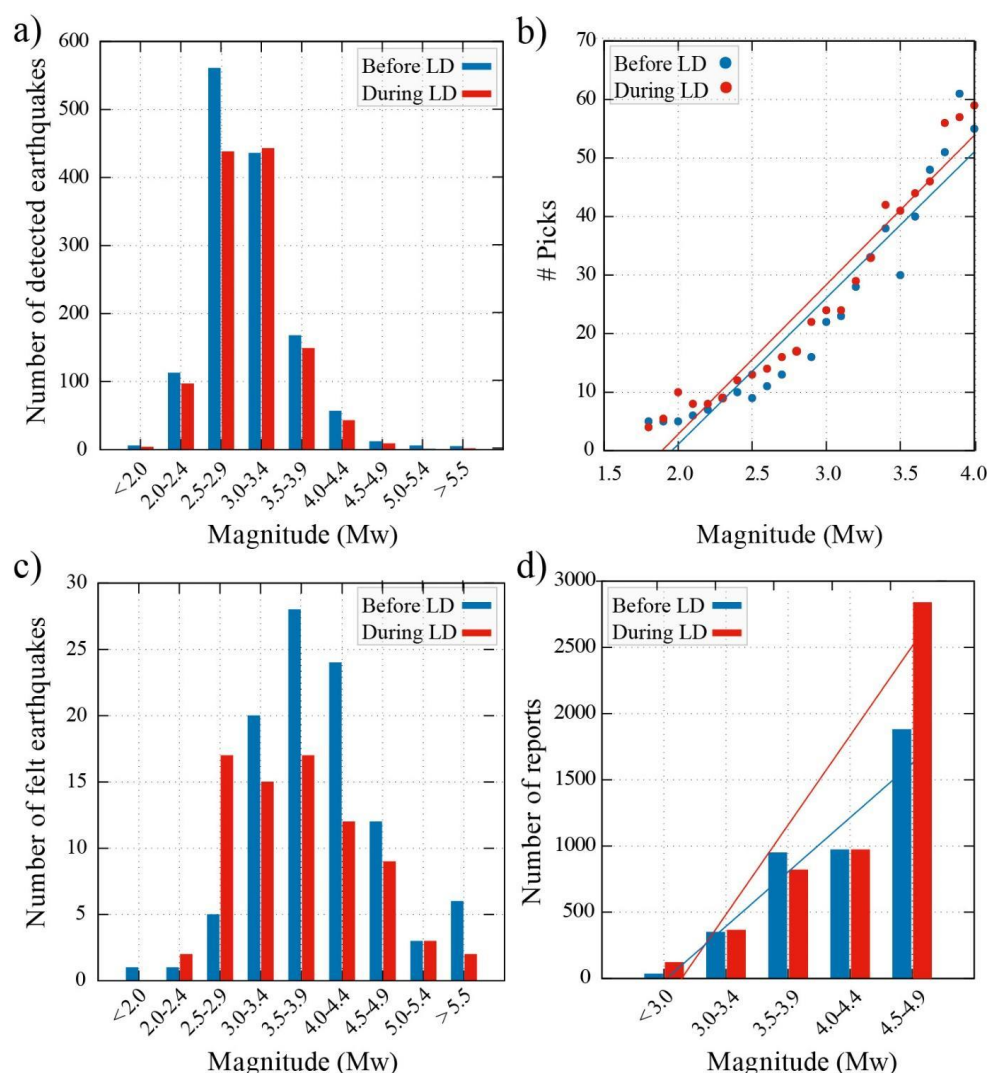

590

591

592

593

594

595

596

597

**Figure 7.** Event detection and felt earthquakes reported in Costa Rica before (1 Nov 2019-15 Mar 2020) and during (16 Mar-31 Jul 2020) lockdown measures. a) Number of detected earthquakes. b) Earthquake magnitude versus the average of P seismic phases per magnitude for events with Mw < 4.0, and the corresponding linear fits. c) Number of felt earthquakes in Costa Rica. d) Magnitude versus the number of reports from the population through the RSN application “¿Lo Sentiste?” for events with Mw < 5.0, and the corresponding linear fits. LD means “lockdown”.

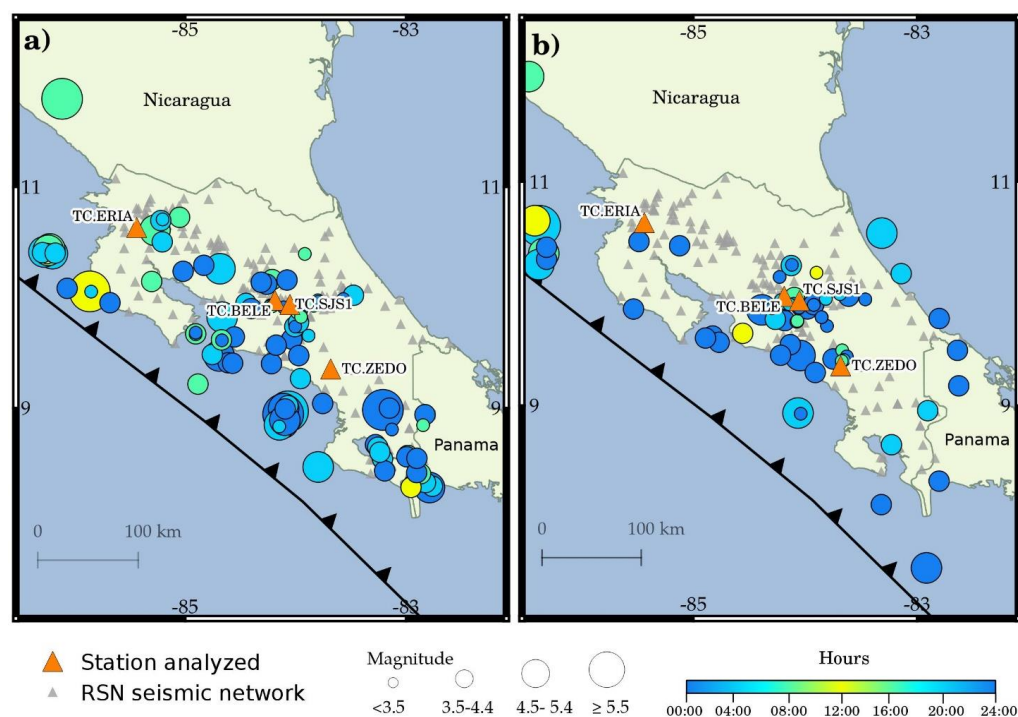

**Figure 8.** Map of felt earthquakes reported in Costa Rica. a) Before lockdown measures (1 Nov 2019–15 Mar 2020). b) During lockdown measures (16 Mar–31 Jul 2020).



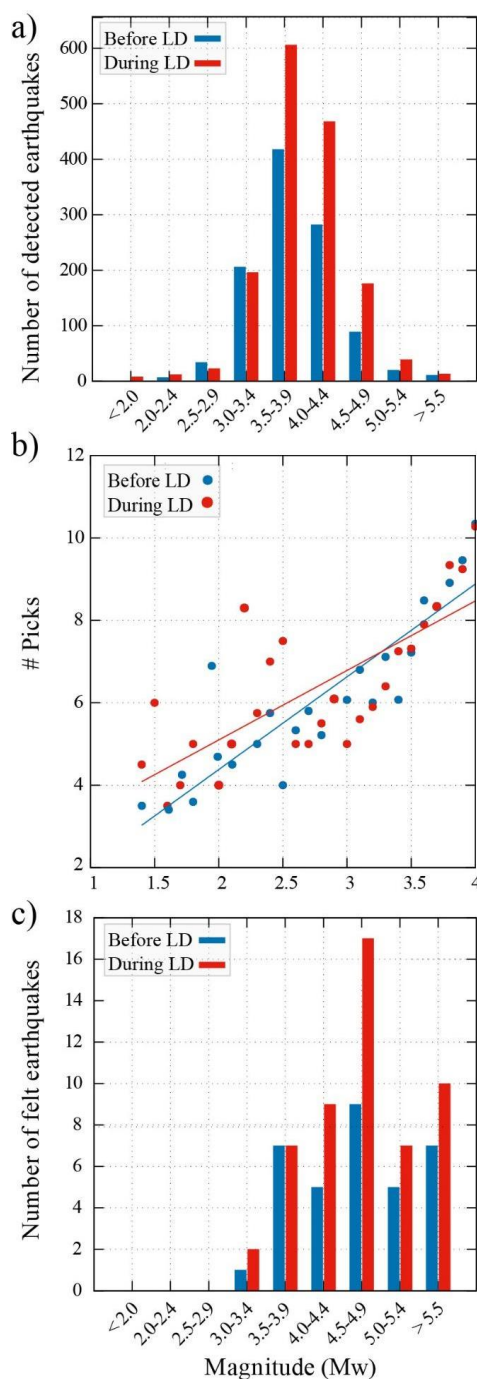

601  
 602 **Figure 9.** Event detection and felt earthquakes reported in Guatemala before (1 Nov 2019-15 Mar 2020) and  
 603 during (16 Mar-31 Jul 2020) lockdown measures. a) Number of detected earthquakes. b) Earthquakes magnitude  
 604 versus the average of P seismic phases per magnitude for  $M_w < 4.0$  events, and the corresponding linear fits. c)  
 605 Number of felt earthquakes in Guatemala. LD means “lockdown”.

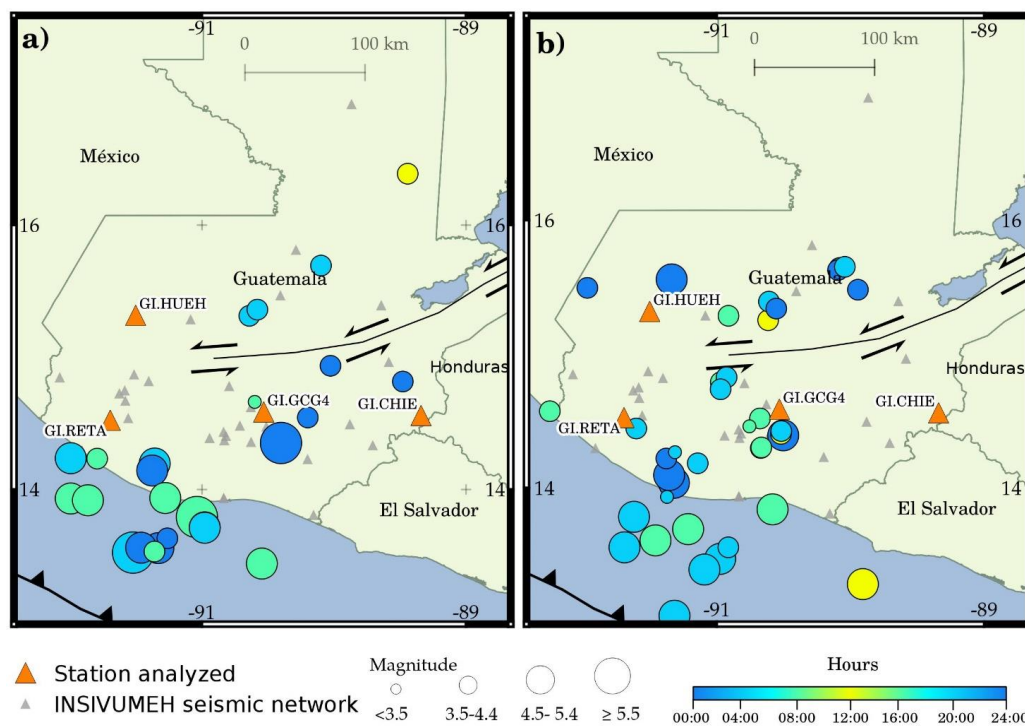

**Figure 10.** Map of felt earthquakes reported in Guatemala. a) Before lockdown measures (1 Nov 2019-15 Mar 2020). b) During lockdown measures (16 Mar-31 Jul 2020).



609 Appendix: additional figure and table

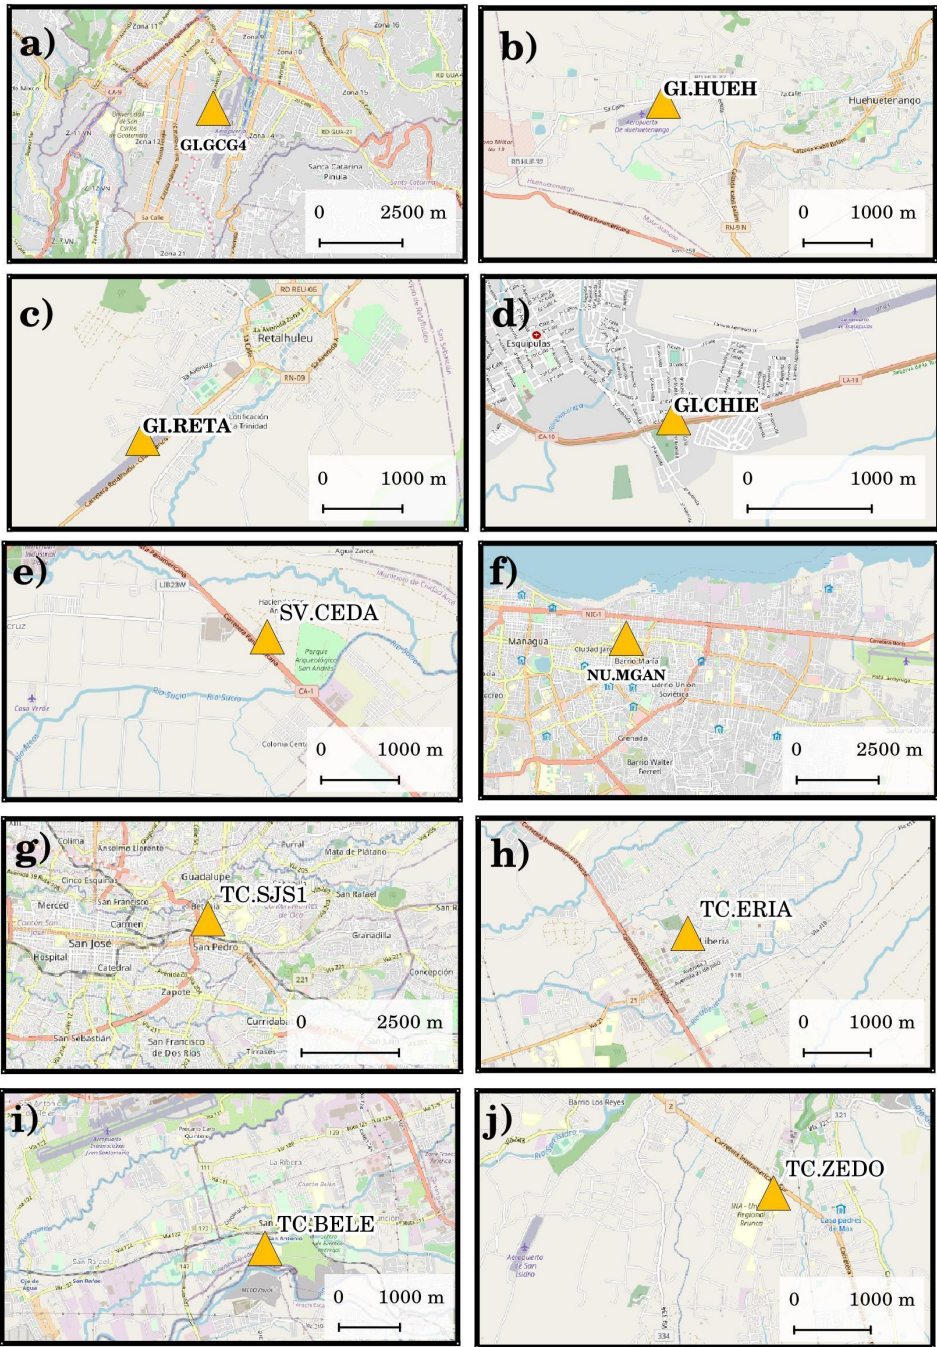

610  
611 **Figure A1.** Images from Open Street Maps of the site areas of the seismic stations (orange triangles) used in this  
612 work. © OpenStreetMap contributors 2020. Distributed under the Open Data Commons Open Database License  
613 (ODbL) v1.0.

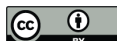

614 **Table A1.** Main mobility lockdown measures between March and October 2020, in Costa Rica, Guatemala, and  
 615 El Salvador during the Covid-19 pandemic according with the “Sistema de Integración Centroamericana” (SICA),  
 616 (2020). Nicaragua did not establish lockdown measures for social mobility; therefore, it is not included in this  
 617 table. On March 18 the first positive case of Covid-19 was found in Nicaragua.  
 618

| Month             | Costa Rica                                                                                                                                                                                                                                                                                                                                                                                                                                                                                                                                                                                                                                                                  | Guatemala                                                                                                                                                                                                                                                                                                                                                                                                                                                                                                                                                     | El Salvador                                                                                                                                                                                                                                                                                                                                                                               |
|-------------------|-----------------------------------------------------------------------------------------------------------------------------------------------------------------------------------------------------------------------------------------------------------------------------------------------------------------------------------------------------------------------------------------------------------------------------------------------------------------------------------------------------------------------------------------------------------------------------------------------------------------------------------------------------------------------------|---------------------------------------------------------------------------------------------------------------------------------------------------------------------------------------------------------------------------------------------------------------------------------------------------------------------------------------------------------------------------------------------------------------------------------------------------------------------------------------------------------------------------------------------------------------|-------------------------------------------------------------------------------------------------------------------------------------------------------------------------------------------------------------------------------------------------------------------------------------------------------------------------------------------------------------------------------------------|
| <i>March 2020</i> | <p><b>Day 6</b>, the first positive case for Covid-19 is detected.</p> <p><b>Day 9</b>, the National Emergency Commission (CNE) and the Ministry of Health declare a yellow health alert.</p> <p><b>Day 12</b>, closure of schools at risk; 50% reduction in capacity in meeting spaces; suspension of trips abroad for public employees.</p> <p><b>Day 16</b>, a state of national emergency is declared.</p> <p><b>Day 17</b>, closure of public and private educational centers, closure of non-essential stores, prohibition of mass events and total closure of beaches throughout the country.</p> <p><b>Day 24</b>, vehicle mobility restriction from 22h to 5h.</p> | <p><b>Day 6</b>, red alert is extended to the entire country after the first positive case for Covid-19 is detected</p> <p><b>Day 16</b>, classes are suspended and the borders with El Salvador are closed.</p> <p><b>Day 17</b>, suspension of work activities in the public and private sectors, suspension of public transport, prohibition of meetings of any kind, religious and sport activities, closing of shopping centers. Total closure of air and land borders is declared</p>                                                                   | <p><b>Day 11</b>, suspension of educational activities</p> <p><b>Day 16</b>, suspension of public and sport shows, closing of bars and gyms and non-essential shops.</p> <p><b>Day 17</b>, El Salvador International Airport closes operations.</p> <p><b>Day 18</b>, first positive case for Covid-19 detected.</p> <p><b>Day 22</b>, mandatory 30-day quarantine and ban on crowds.</p> |
| <i>April 2020</i> | <p><b>Day 1</b>, during Easter the daytime vehicle restriction was in place from 5h-17h. Vehicular traffic was allowed only one day per week according to the license plate number to make essential purchases.</p> <p><b>Day 11</b>, a nighttime vehicle restriction is established 19h-5h until May 15.</p>                                                                                                                                                                                                                                                                                                                                                               | <p><b>Day 1</b>, air reserve to monitor borders.</p> <p><b>Day 9</b>, suspension of school lessons for the whole month.</p>                                                                                                                                                                                                                                                                                                                                                                                                                                   | <p><b>Day 3</b>, no circulation on beaches, rivers, lakes, spas, or tourist centers in the country.</p> <p><b>Day 13</b>, entire population to be kept in compulsory home security with some exceptions, extended until April 28.</p>                                                                                                                                                     |
| <i>May 2020</i>   | <p><b>Day 1</b>, all public spaces and shops work at 50%; gradual reactivation of work centers from 5h-19h.</p> <p><b>Day 16</b>, vehicle restriction is maintained from 5h-19h. Opening of hotels with a capacity of 50%. Opening of some national parks (50%). Beaches are open Monday-Friday from 5h-8h.</p>                                                                                                                                                                                                                                                                                                                                                             | <p><b>Day 4</b>, opening of shopping malls with few stores. Activities and public transport, as well as classes are suspended. Curfew from 18h-4h. Prohibition of transit between departments.</p> <p><b>Day 14</b>, cantonal and municipal markets can open Monday, Wednesday, and Thursday from 6h to 13h, as well as supermarkets and convenience stores, from 9h-16h. Closure of the country under restriction of total mobilization.</p> <p><b>Day 25</b>, curfew 17h-5h with vehicle restriction between departments. Total closure of the country.</p> | <p><b>Day 7</b>, restriction of mobility between municipalities, people can circulate according to their occupation.</p> <p><b>Day 10</b>, public transport may only circulate to mobilize duly identified health personnel.</p>                                                                                                                                                          |



|                       |                                                                                                                                                                                                                                                                                                                                                                                                                             |                                                                                                                                                                                                                                                                                  |                                                                                                                                                                                                                                                                                |
|-----------------------|-----------------------------------------------------------------------------------------------------------------------------------------------------------------------------------------------------------------------------------------------------------------------------------------------------------------------------------------------------------------------------------------------------------------------------|----------------------------------------------------------------------------------------------------------------------------------------------------------------------------------------------------------------------------------------------------------------------------------|--------------------------------------------------------------------------------------------------------------------------------------------------------------------------------------------------------------------------------------------------------------------------------|
| <i>June 2020</i>      | <p><b>Day 1</b>, tourist transport is enabled with restrictions and special measures. Operation of gyms, cafes, restaurants, and museums with a capacity of 50%</p> <p><b>Day 20</b>, access to beaches from 5h-9:30h</p> <p><b>Day 26</b>, mandatory use of masks is established.</p>                                                                                                                                      | <p><b>Day 15</b>, mobilization according to the last digit of the car plate in the country's departments.</p>                                                                                                                                                                    | <p><b>Day 16</b>, restriction of mobility according to the last number of the identity document.</p>                                                                                                                                                                           |
| <i>July 2020</i>      | <p><b>Day 3</b>, public parks, bars and massive events closed.</p> <p><b>Day 11</b>, vehicle restriction for the whole country from 5h-17h according to license plate number.</p> <p><b>Day 14</b>, increase in the capacity in public transport from 20% to 50% in routes shorter than 75 km.</p> <p><b>Day 20</b>, vehicle restriction from 17h-5h according to license plates, but only in cantons with orange alert</p> | <p><b>Day 13</b>, curfew is established from Monday to Friday from 18h-5h and Saturdays from 14h-5h.</p> <p><b>Day 26</b>, vehicle restriction by license plate is eliminated and the curfew is modified from 21h-4h.</p>                                                        | <p><b>Day 6</b>, high restrictions are extended for 15 days, due to the increase in infections and deaths from Covid-19.</p> <p><b>Day 29</b>, beginning of a new phase of economic reopening.</p>                                                                             |
| <i>August 2020</i>    | <p><b>Day 1</b>, opening of commercial flights with limited routes from Europe.</p> <p><b>Day 31</b>, Costa Ricans who return to the country may not quarantine. New vehicle restriction for weekdays 5h-22h and weekends 5h-20h.</p>                                                                                                                                                                                       | <p><b>Day 24</b>, religious activities are reestablished with a maximum of 1 hour and a limit of attendees.</p> <p><b>Day 26</b>, reopening of the La Aurora Zoo.</p>                                                                                                            | <p><b>Day 9</b>, personal clusters are established: groups that do not exceed 10 people are allowed to socialize.</p> <p><b>Day 24</b>, beginning of the "Transitory Phase" in the process of gradual reactivation of the economy.</p>                                         |
| <i>September 2020</i> | <p><b>Day 9</b>, temporary suspension of activities that involve massive movements of people. Controlled opening of economic activities.</p>                                                                                                                                                                                                                                                                                | <p><b>Day 6</b>, public servants work hours from 7h-15h.</p> <p><b>Day 18</b>, international airport reopens. Entry to the country conditioned to a negative PCR test.</p> <p><b>Day 28</b>, vehicle restriction from 9h to 16h. Prohibition of alcohol sale between 19h-5h.</p> | <p><b>Day 1</b>, El Salvador begins a new phase of economic reopening that includes public transportation and a good part of economic activities.</p>                                                                                                                          |
| <i>October 2020</i>   | <p><b>Day 1</b>, opening of borders for travelers from California, Mexico, Jamaica, and Ohio.</p> <p><b>Day 15</b>, opening of flights from Central America.</p> <p><b>Day 26</b>, foreign travelers not required present a negative Covid-test.</p> <p><b>Day 27</b>, permission to use outdoor spaces for recreation.</p>                                                                                                 | <p><b>Day 1</b>, reopening of higher education centers and technical training centers.</p> <p><b>Day 7</b>, hotel and tourism workers are allowed to hold events with restricted capacity.</p>                                                                                   | <p><b>Day 3</b>, cultural spaces open. Opening of stadiums and public shows with a distance between people of two meters, trips to the beach at restricted hours, museums, cinemas, and hotels with capacity reduced to 50%. The public sector in general returns to work.</p> |
